# Supplementary material for: A trafficking regulatory subnetwork governs αVβ6 integrin-HER2 cross-talk to control breast cancer invasion and drug resistance
Source: PubMed Central journal article supplement (PMC11616693; doi:10.1126/sciadv.adk9944), 2024-12-04
Supplement: sciadv.adk9944_sm.pdf [file sciadv.adk9944_sm.pdf]

Supplementary Materials for

**A trafficking regulatory subnetwork governs  $\alpha_V\beta_6$  integrin-HER2 cross-talk to control breast cancer invasion and drug resistance**

Horacio Maldonado *et al.*

Corresponding author: Mark R. Morgan, mark.morgan@liverpool.ac.uk

*Sci. Adv.* **10**, eadk9944 (2024)  
DOI: 10.1126/sciadv.adk9944

**The PDF file includes:**

Supplementary Results and Discussion  
Figs. S1 to S13  
Legends for supplementary files S1 to S3

**Other Supplementary Material for this manuscript includes the following:**

Supplementary files S1 to S3

## SUPPLEMENTARY RESULTS & DISCUSSION

### Overview

Data presented in the main **Results** section indicate that key components of the trafficking regulatory subnetwork recruited to  $\alpha_v\beta_6$  adhesion complexes, regulate HER2 endocytosis and trafficking; suggesting a role for these molecules in mediating integrin  $\alpha_v\beta_6$ -HER2 crosstalk, TGF $\beta$  activation and invasion of HER2+ breast cancer cells. Moreover, these mechanisms are dysregulated in trastuzumab-resistant cells.

In this **Supplementary Results** section, we present further data that highlights the complex interplay between RAB5, RAB7A and GDI2, in the context of  $\alpha_v\beta_6$ -dependent HER2 trafficking. We explore the relationship between components of the trafficking regulatory sub-network, identify features modulating  $\alpha_v\beta_6$ /LAP-dependent HER2 internalisation and intracellular accumulation, and speculate on potential mechanisms modulating  $\alpha_v\beta_6$  and HER2 proteostasis, signalling and function, that demand further investigation in the future.

### Interplay of RAB5, RAB7A and GDI2 in HER2 in LAP-dependent HER2 internalisation and accumulation

NB: Data from Fig. 4E/F are re-presented in the Supplementary Materials as Fig. S11A and S11C, respectively, alongside further conditions modulating GDI2 expression in conjunction with manipulation of RAB5 and RAB7 activity.

As highlighted in the main **Results** section, in siControl trastuzumab-sensitive cells, 30 min LAP stimulation induced significant HER2 internalisation (Fig. 4E/S11A; mCherry). Whereas expression of either constitutively active RAB5Q79L (RAB5CA) or dominant negative RAB5S34N (RAB5DN) induced constitutive HER2 internalisation and intracellular accumulation, even in the absence of LAP stimulation (Fig. 4E/S11A, RAB5CA/RAB5DN). Superficially, these characteristics seem to mimic the effect of suppressing GDI2 expression on HER2 internalisation, which leads to enhanced HER2 internalisation, even in the absence of LAP stimulation (Fig. 5A).

However, following GDI2 knockdown, constitutively active RAB5Q79L (RAB5CA) renders cells sensitive to LAP stimulation, further increasing HER2 internalisation relative to untreated (30 min Control) cells (Fig. S11A/B, RAB5CA). Moreover, expression of dominant negative RAB5S34N (RAB5DN) in GDI2 knockdown cells, reduces levels of HER2 internalisation relative to untreated cells (Fig. S11A/B, RAB5DN). Importantly, these data suggest that in wildtype cells, GDI2 constrains RAB5-driven LAP-induced internalisation. Such that in the absence of GDI2 expression, elevated Rab5 activity can further promote LAP-induced HER2 intracellular accumulation. Whereas reduced RAB5 functionality, as a result of RAB5DN, reduces the level of HER2 internalisation following LAP treatment.

Together, these data suggest that in control cells, GDI2 serves to limit the activity of RAB5; perhaps acting as a break to constrain dysregulated receptor trafficking. Given the recruitment of GDI2 to HER2-enriched  $\alpha_v\beta_6$ -mediated adhesion complexes, it is tempting to speculate that GDI2 could serve a key role in co-ordinating spatiotemporal regulation of trafficking dynamics

and signalling. Whereas, in the absence of GDI2, as seen in trastuzumab-resistant cells which exhibit reduced levels of GDI2 proximal to  $\alpha_v\beta_6$  IACs, these control mechanisms appear to be dysregulated.

Data presented in the **Results** section, indicated that dominant-negative RAB7T22N (RAB7DN) led to increased intracellular HER2 levels following 30 min LAP treatment, relative to nil treatment and mCherry control cells (Fig. 4E, S11A; mCherry 30 min LAP vs RAB7DN 30 min LAP, RAB7DN 30 min nil vs RAB7DN 30 min LAP). Loss of GDI2 resulted in elevated intracellular accumulation of HER2 in RAB7DN-expressing cells, but to no greater extent than in mCherry control siGDI2 cells (Fig. S11B; mCherry 30 min LAP vs RAB7DN 30 min LAP). These data, and the fact that RAB7 typically operates downstream of RAB5 in the endolysosomal pathway (53, 55, 57, 58), may suggest that any potential effect of GDI2 on RAB7-mediated functions, is likely due to effects on upstream trafficking regulators such as RAB5, rather than directly on RAB7A. The enhanced response to LAP in siControl cells expressing dominant-negative RAB7, relative to mCherry, in the presence of LAP treatment, could also be consistent with the effect of GDI2 knockdown on earlier steps in the trafficking pathway, such as modulation of RAB5 activity. This would also be in agreement with data showing that, while trastuzumab-resistant cells exhibited high levels of RAB7A activity, LAP stimulation and the associated induction of HER2 endocytosis did not modulate RAB7A activity in either trastuzumab-sensitive or trastuzumab-resistant cells (Fig. S9B). So, while stimulation of  $\alpha_v\beta_6$  with LAP promotes co-localisation of HER2 with RAB7A, it does not modulate RAB7A activity directly.

While these studies suggest a complex relationship exists between GDI2, RAB5 and RAB7A, it is important not to over-interpret the data. The experimental setup does not enable us to distinguish between changes in initial HER2 endocytic rates, versus downstream accumulation of HER2 due to inhibition of HER2 degradation. While it is possible to speculate on these characteristics, based on what is known about the role of different GTPases in modulating endolysosomal biogenesis, transport and degradation, the complexity of the system means these conclusions should be treated cautiously. To get genuine mechanistic and spatiotemporal insight, going forward, it will be essential to employ super-resolution live cell imaging approaches to determine where and when the specific GTPases are recruited to different endomembranes, following specific and pulsed stimuli.

Despite the lack of evidence that GDI2 modulates RAB7 activity directly, it is likely that RAB7 still plays a critical role in controlling  $\alpha_v\beta_6$  and HER2 functions. Integrin and RTK function and expression are under direct control of the endolysosomal network, which exerts spatiotemporal control over intracellular trafficking, recycling and degradation mechanisms (28, 41, 77). RAB5 to RAB7 conversion is a key step within this pathway and the prevailing model suggests that a cut-off switch exists, which requires localised activation of RAB7 to ensure directionality and irreversibility of late endosome biogenesis (93). Thus, there is now a need to fully explore how GDI2 and other GTPase regulators, modulate RAB conversion and the biogenesis of the endolysosomal network, to co-ordinate  $\alpha_v\beta_6$  and HER2 bioavailability and function.

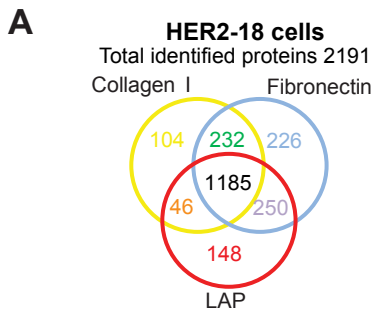

**B** **HER2-18: FIBRONECTIN VS COLLAGEN I**

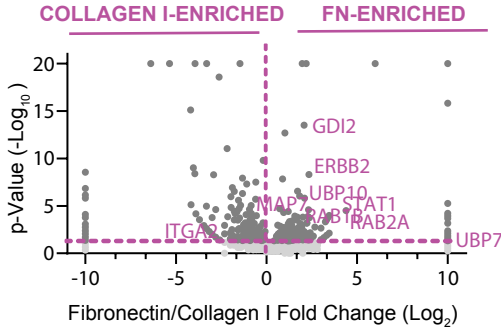

**C** **HER2-18: FIBRONECTIN VS LAP**

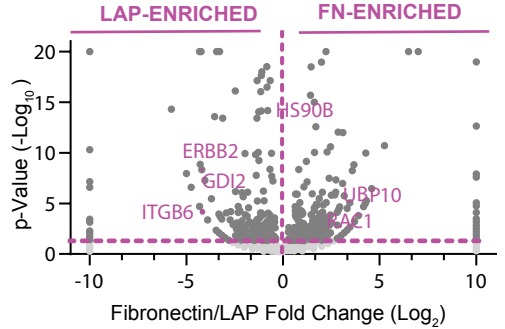

**D** **GO-Term analysis: HER2-18 (FN-Enriched)**

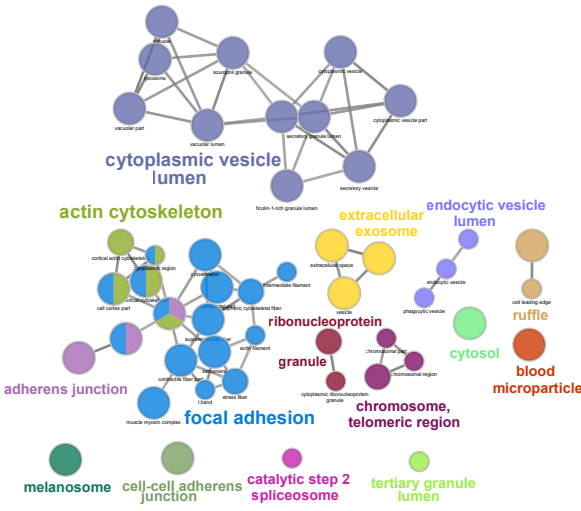

**E** **GO-Term analysis: HER2-18 (LAP-Enriched)**

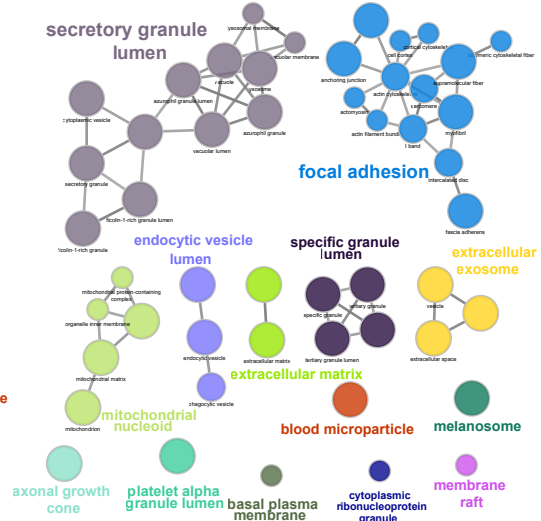

**FIGURE S1**

**Figure S1: Label-free proteomic analysis of IAC enrichment in HER2-18 cells seeded on different matrices.** IAC enrichment coupled with free-label mass spectrometry analysis was used to define proteins specifically recruited to ligand-bound  $\alpha_v\beta_6$  in HER2-18 cells. **A)** Venn diagram showing total identified proteins recruited to IAC on different substrates including LAP ( $\alpha_v\beta_6$ -selective ligand), fibronectin ( $\alpha_v\beta_6$ -binding non-selective ligand) and collagen-I (non- $\alpha_v\beta_6$ -binding ligand). 2,191 proteins were identified with at least 90% confidence. Overlap of proteins identified on all ligands: 1,185 proteins; 54%. Detected proteins unique to each ligand – LAP: 148; fibronectin: 226; collagen-I: 104; or shared between two ligands - LAP/FN: 250; LAP/Collagen-I: 46; FN/Collagen-I: 232. **B/C)** Volcano plots demonstrating enrichment of proteins identified on **(B)** fibronectin (right) and collagen-I (left) matrices and **(C)** fibronectin (right) and LAP (left) matrices. Pairwise statistical analysis: Fisher's exact test; quantitative method: weighted spectra; significance level:  $P < 0.05$ . Significant proteins (dark grey); non-significant proteins (light grey); proteins of interest highlighted in purple. **D/E)** Visual representation of ClueGO cellular compartment gene ontology (GO) analyses of proteins significantly enriched on **(D)** Fibronectin in comparison with Collagen-I, or **(E)** LAP in comparison with Fibronectin in HER2-18 cells. Colours represent specific merged GO term groups, node size represents level of significance of each GO term, clustering and edge length represent functionally grouped networks based on kappa score. All mass spectrometry data represent 3 independent experiments.

**A**

Cell-Matrix Interface

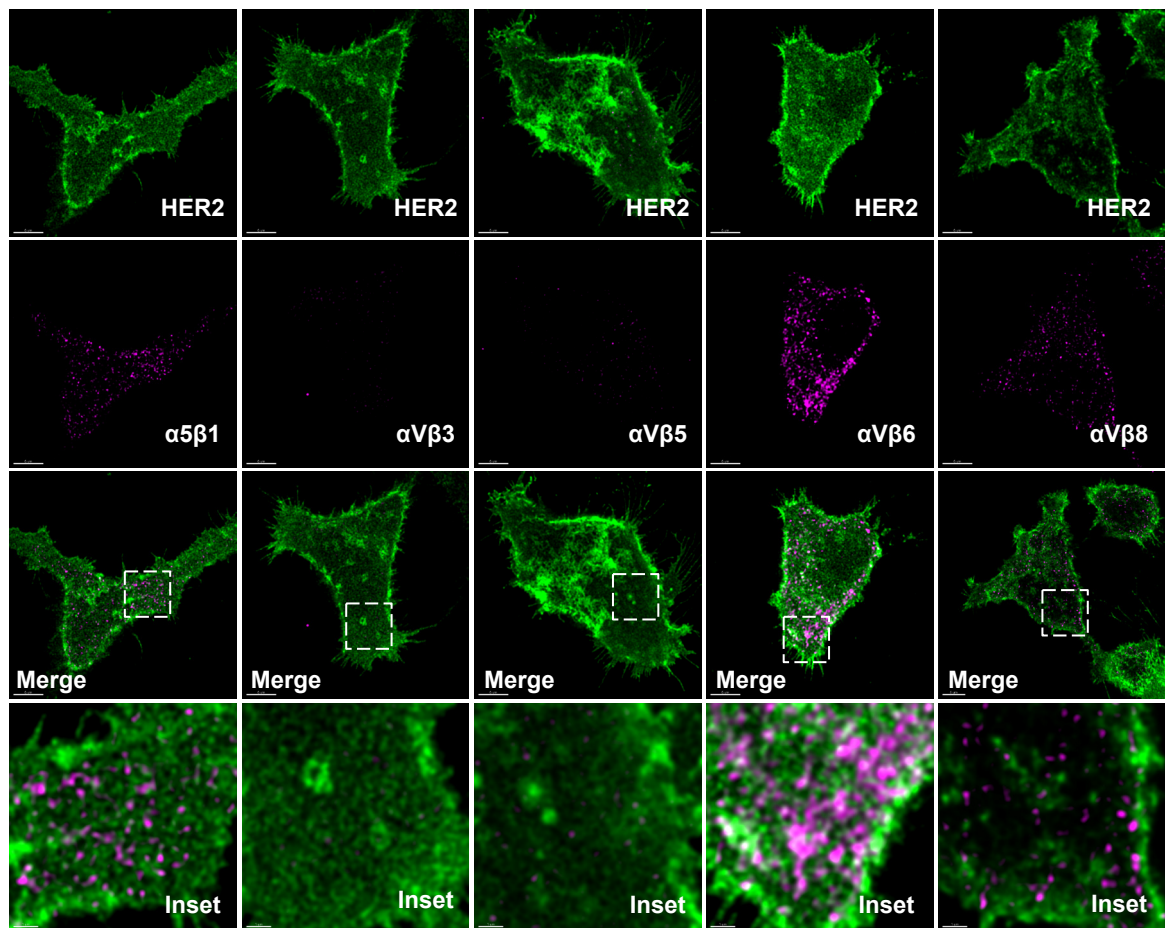

Substrate: LAP

**FIGURE S2**

**Figure S2: Integrin  $\alpha_v\beta_6$  is the primary RGD-binding integrin recruited on LAP and co-localises with HER2 at the cell-matrix interface.** Immunofluorescent staining of RGD-binding integrins  $\alpha_5\beta_1$ ,  $\alpha_v\beta_3$ ,  $\alpha_v\beta_5$ ,  $\alpha_v\beta_6$  &  $\alpha_v\beta_8$ , (magenta) and HER2 (green) in HER2-18 cells attached to LAP. Images show the basal Z-plane representing the cell-matrix interface. White pixels indicate integrin/HER2 colocalisation. Dashed boxes indicate location of insets; scale bar represents 10  $\mu\text{m}$ .





**Figure S3: Label-free proteomic analysis of IAC enrichment in BT474 cells seeded on different matrices.** IAC enrichment coupled with free-label mass spectrometry analysis was used to define proteins specifically recruited to ligand-bound  $\alpha_v\beta_6$  in BT474 cells. **A)** Venn diagram showing total identified proteins recruited to IAC on different substrates including LAP ( $\alpha_v\beta_6$ -selective ligand), fibronectin ( $\alpha_v\beta_6$ -binding non-selective ligand) and collagen-I (non- $\alpha_v\beta_6$ -binding ligand). 2,609 proteins were identified with at least 90% confidence. Overlap of proteins identified on all ligands: 1,374 proteins; 53%. Detected proteins unique to each ligand – LAP: 251; fibronectin: 243; collagen-I: 179; or shared between two ligands - LAP/FN: 286; LAP/Collagen-I: 112; FN/Collagen-I: 164. **B/C)** Volcano plots demonstrating enrichment of proteins identified on **(B)** fibronectin (right) and collagen-I (left) matrices and **(C)** fibronectin (right) and LAP (left) matrices. Pairwise statistical analysis: Fisher's exact test; quantitative method: weighted spectra; significance level:  $P < 0.05$ . Significant proteins (dark grey); non-significant proteins (light grey); proteins of interest highlighted in purple. **D/E)** Visual representation of ClueGO cellular compartment gene ontology (GO) analyses of proteins significantly enriched on **(D)** Fibronectin in comparison with Collagen-I, or **(E)** LAP in comparison with Fibronectin in BT474 cells. Colours represent specific merged GO term groups, node size represents level of significance of each GO term, clustering and edge length represent functionally grouped networks based on kappa score. All mass spectrometry data represent 3 independent experiments.

**A**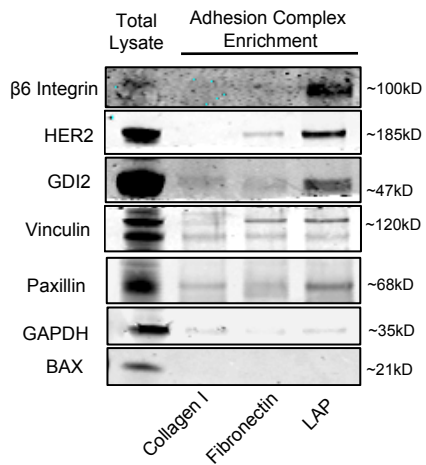**B**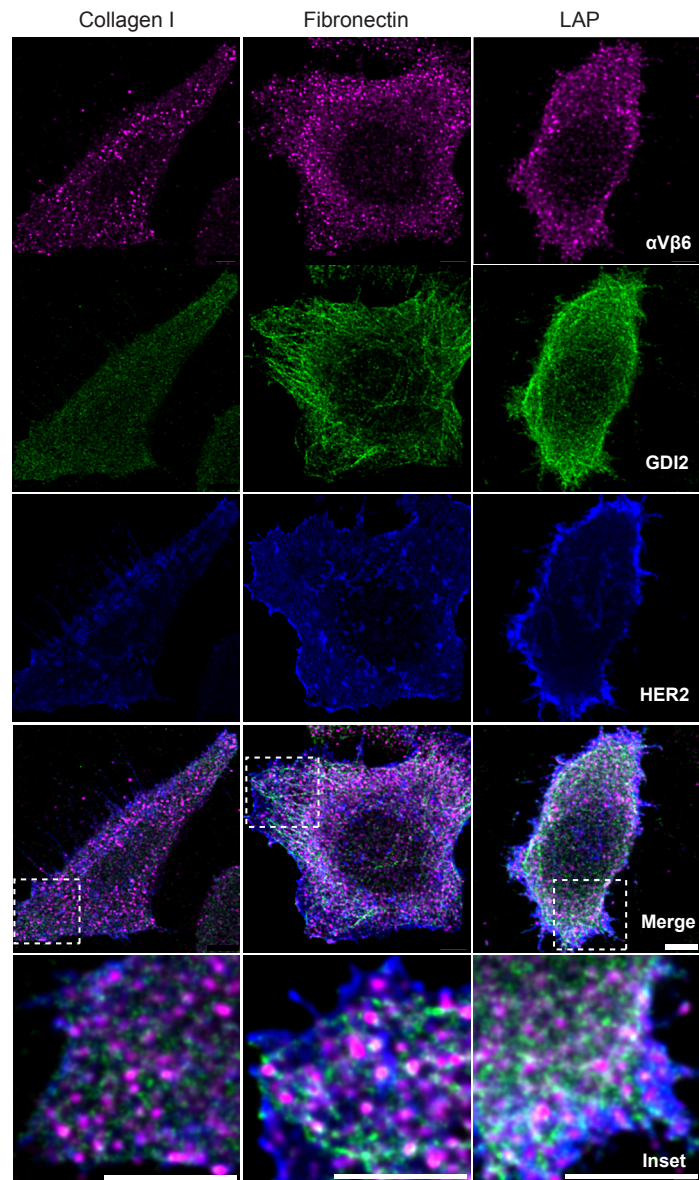**Ba**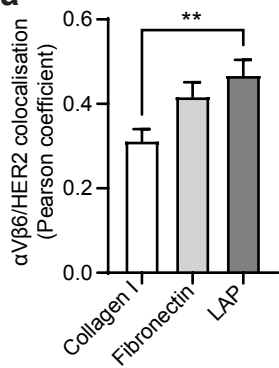**Bb**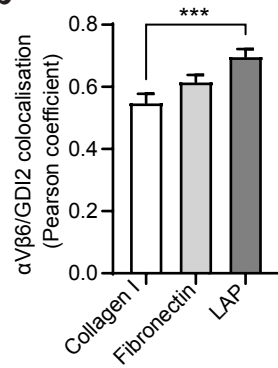**Bc**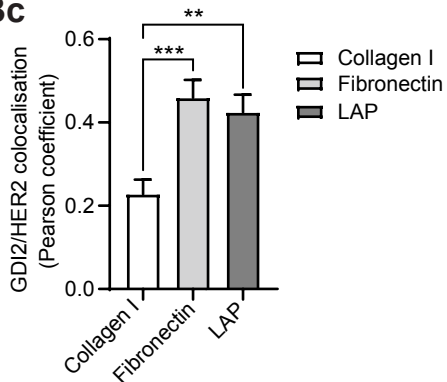**FIGURE S4**

**Figure S4: Ligand-engagement of integrin  $\alpha_v\beta_6$  promotes recruitment of, and colocalisation with, HER2 and GDI2. A)** Immunoblot analysis of  $\beta_6$  integrin, HER2, GDI2, Vinculin, Paxillin, GAPDH and BAX protein levels in IACs isolated from BT474 cells on LAP ( $\alpha_v\beta_6$ -selective ligand), fibronectin ( $\alpha_v\beta_6$ -binding non-selective ligand) and collagen-I (non- $\alpha_v\beta_6$ -binding ligand). **B)** Immunofluorescent staining of  $\alpha_v\beta_6$  integrin (magenta), GDI2 (green) and HER2 (blue) in HER2-18 cells attached to collagen-I, fibronectin and LAP. Images show the basal Z-plane representing the cell-matrix interface. Dashed boxes indicate location of insets; scale bar represents 5  $\mu\text{m}$ . **Ba/b/c)** Quantitative analysis of colocalisation calculated by Pearson's coefficient  $\pm$  S.E.M of **(Ba)**  $\alpha_v\beta_6$ /HER2 colocalisation, **(Bb)**  $\alpha_v\beta_6$ /GDI2 colocalisation, and **(Bc)** GDI2/HER2 colocalisation.  $N = 3$  independent replicate experiments with 24 images analysed per condition. One-Way ANOVA test, followed by a Tukey's multiple comparisons test: **(Ba)**  $\alpha_v\beta_6$ /HER2 colocalisation Collagen-I vs LAP  $P = 0.0046$ ; **(Bb)**  $\alpha_v\beta_6$ /GDI2 colocalisation Collagen-I vs LAP  $P = 0.0004$ ; **(Bc)** GDI2/HER2 colocalisation Collagen-I vs Fibronectin  $P = 0.0004$ , Collagen-I vs LAP  $P = 0.0028$ .

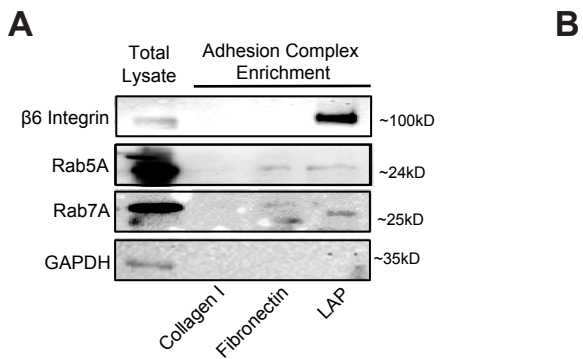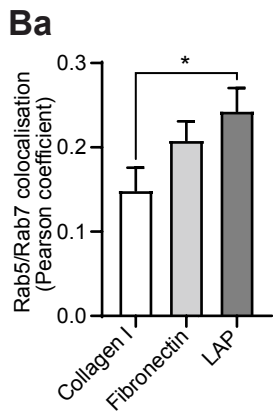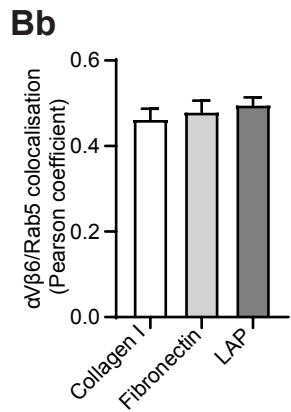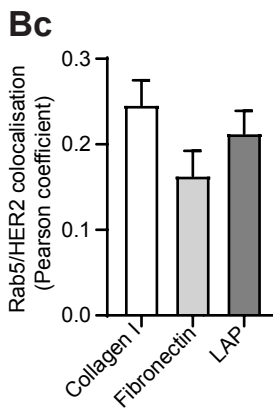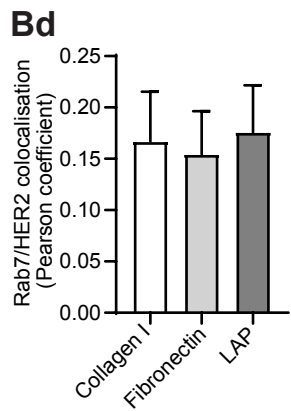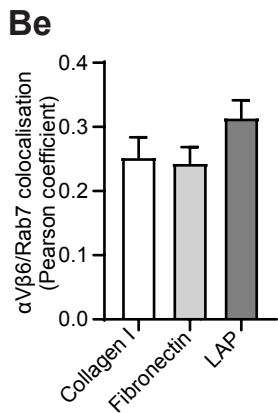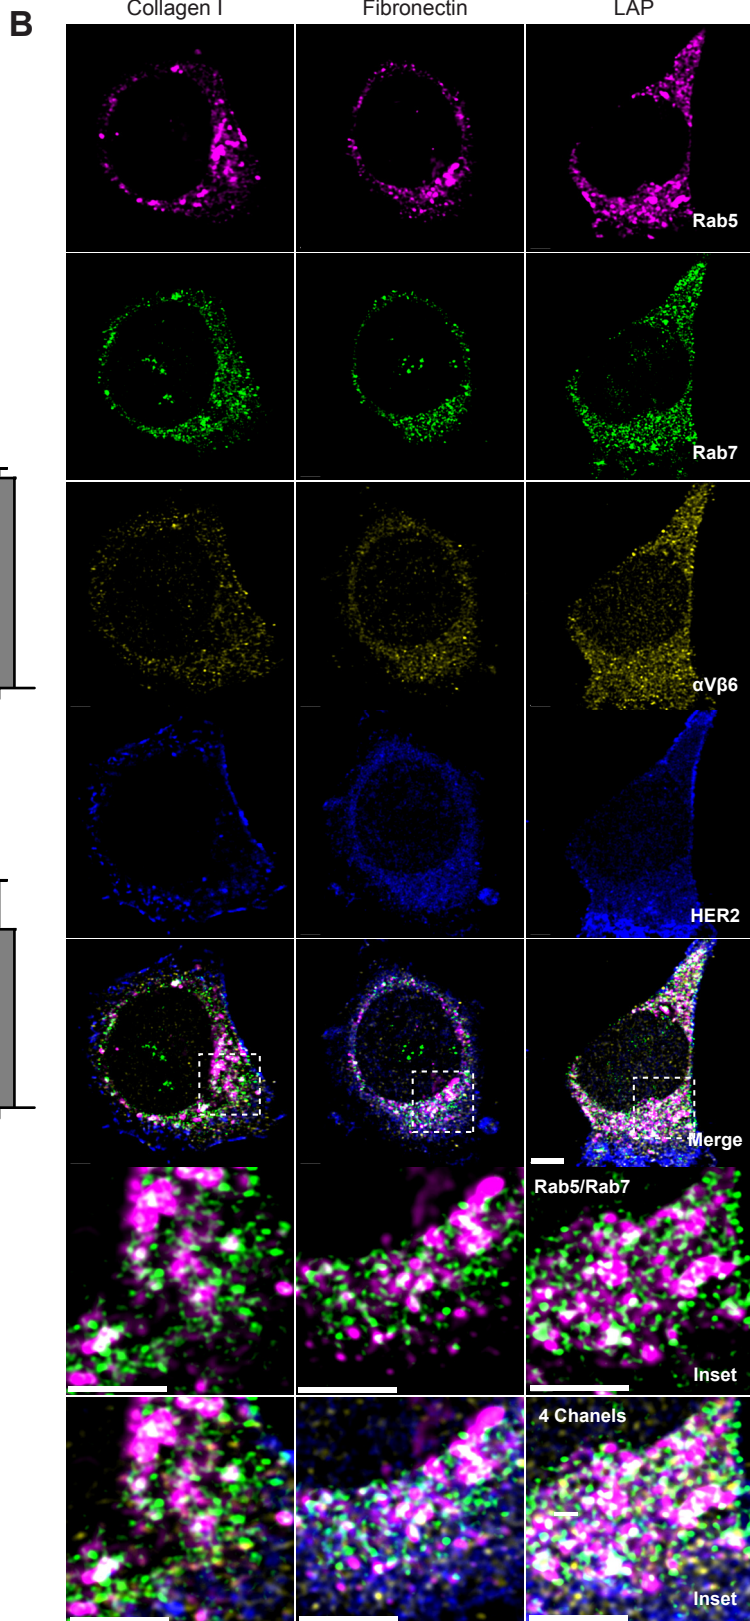

**FIGURE S5**

**Figure S5: Ligand-engagement of integrin  $\alpha_v\beta_6$  promotes recruitment of RAB5 and RAB7 to IACs and increases RAB5/RAB7 colocalisation. A)** Immunoblot analysis of  $\beta_6$  integrin, RAB5A, RAB7A and GAPDH protein levels in IACs isolated from HER2-18 cells on LAP ( $\alpha_v\beta_6$ -selective ligand), fibronectin ( $\alpha_v\beta_6$ -binding non-selective ligand) and collagen-I (non- $\alpha_v\beta_6$ -binding ligand). **B)** Immunofluorescent staining of RAB5 (magenta), RAB7 (green),  $\alpha_v\beta_6$  integrin (yellow) and HER2 (blue) in HER2-18 cells attached to collagen-I, fibronectin and LAP. Images show central Z-planes representing regions containing endosomal structures. Dashed boxes indicate location of insets; scale bar represents 5  $\mu\text{m}$ . **Ba/b/c/d/e)** Quantitative analysis of colocalisation calculated by Pearson's coefficient  $\pm$  S.E.M of **(Ba)** RAB5/RAB7, **(Bb)**  $\alpha_v\beta_6$ /RAB5, **(Bc)** RAB5/HER2, **(Bd)** RAB7/HER2, and **(Be)**  $\alpha_v\beta_6$ /RAB7 colocalisation.  $N = 3$  independent replicate experiments with 24 images analysed per condition. One-Way ANOVA test, followed by a Tukey's multiple comparisons test: **(Ba)**  $\alpha_v\beta_6$  and RAB5/RAB7 colocalisation Collagen I vs LAP  $P = 0.0327$ .



**Figure S6: Pre-treatment with sub-lethal concentrations of trastuzumab alters the composition of  $\alpha_v\beta_6$ -dependent adhesion complexes. A/B)** Cell viability assay (MTS) for Trastuzumab-Sensitive and Trastuzumab-Resistant BT474 cells. Cells were treated with different concentrations of **(A)** trastuzumab (0, 25, 50, 100 and 200  $\mu\text{g}/\text{mL}$ ), or **(B)** Lapatinib (0, 0.125, 0.250, 0.50 and 1.000  $\mu\text{M}$ ), for 48 hours. Data are arbitrary units (AU) normalised to control means  $\pm$  S.E.M. from 4 independent experiments. Two-way ANOVA with Tukey test for multiple comparisons: Trastuzumab-Sensitive vs Trastuzumab-Resistant 50  $\mu\text{g}/\text{mL}$   $P = 0.0361$ ; 100  $\mu\text{g}/\text{mL}$   $P = 0.0483$ ; 200  $\mu\text{g}/\text{mL}$   $P = 0.0001$ . Statistical significance  $*P < 0.05$ ,  $***P < 0.001$ . **C/D)** IAC enrichment coupled with free-label mass spectrometry was used to define proteins specifically recruited to ligand-bound  $\alpha_v\beta_6$  in trastuzumab-sensitive BT474 cells treated with trastuzumab (10  $\mu\text{g}/\text{mL}$ ) for 4 days prior to plating on LAP. **C)** Protein-protein interaction network of proteins significantly enriched in  $\alpha_v\beta_6$ -mediated adhesion complexes of trastuzumab-sensitive cells pre-treated with trastuzumab (red nodes) or vehicle control (blue nodes). Lines (edges) linking nodes represent protein-protein interactions. **D)** Visual representation of ClueGO cellular compartment GO analyses of proteins significantly enriched in  $\alpha_v\beta_6$ -mediated complexes of trastuzumab-sensitive BT474s treated with trastuzumab, relative to untreated controls. Node size represents number of mapped proteins in each GO term, colour indicates level of significance of each GO term, node clustering and edge length represent functionally grouped networks based on kappa score. All mass spectrometry experiments represent the average of 3 independent experiments. Data relate to **Figure 3D-F**.

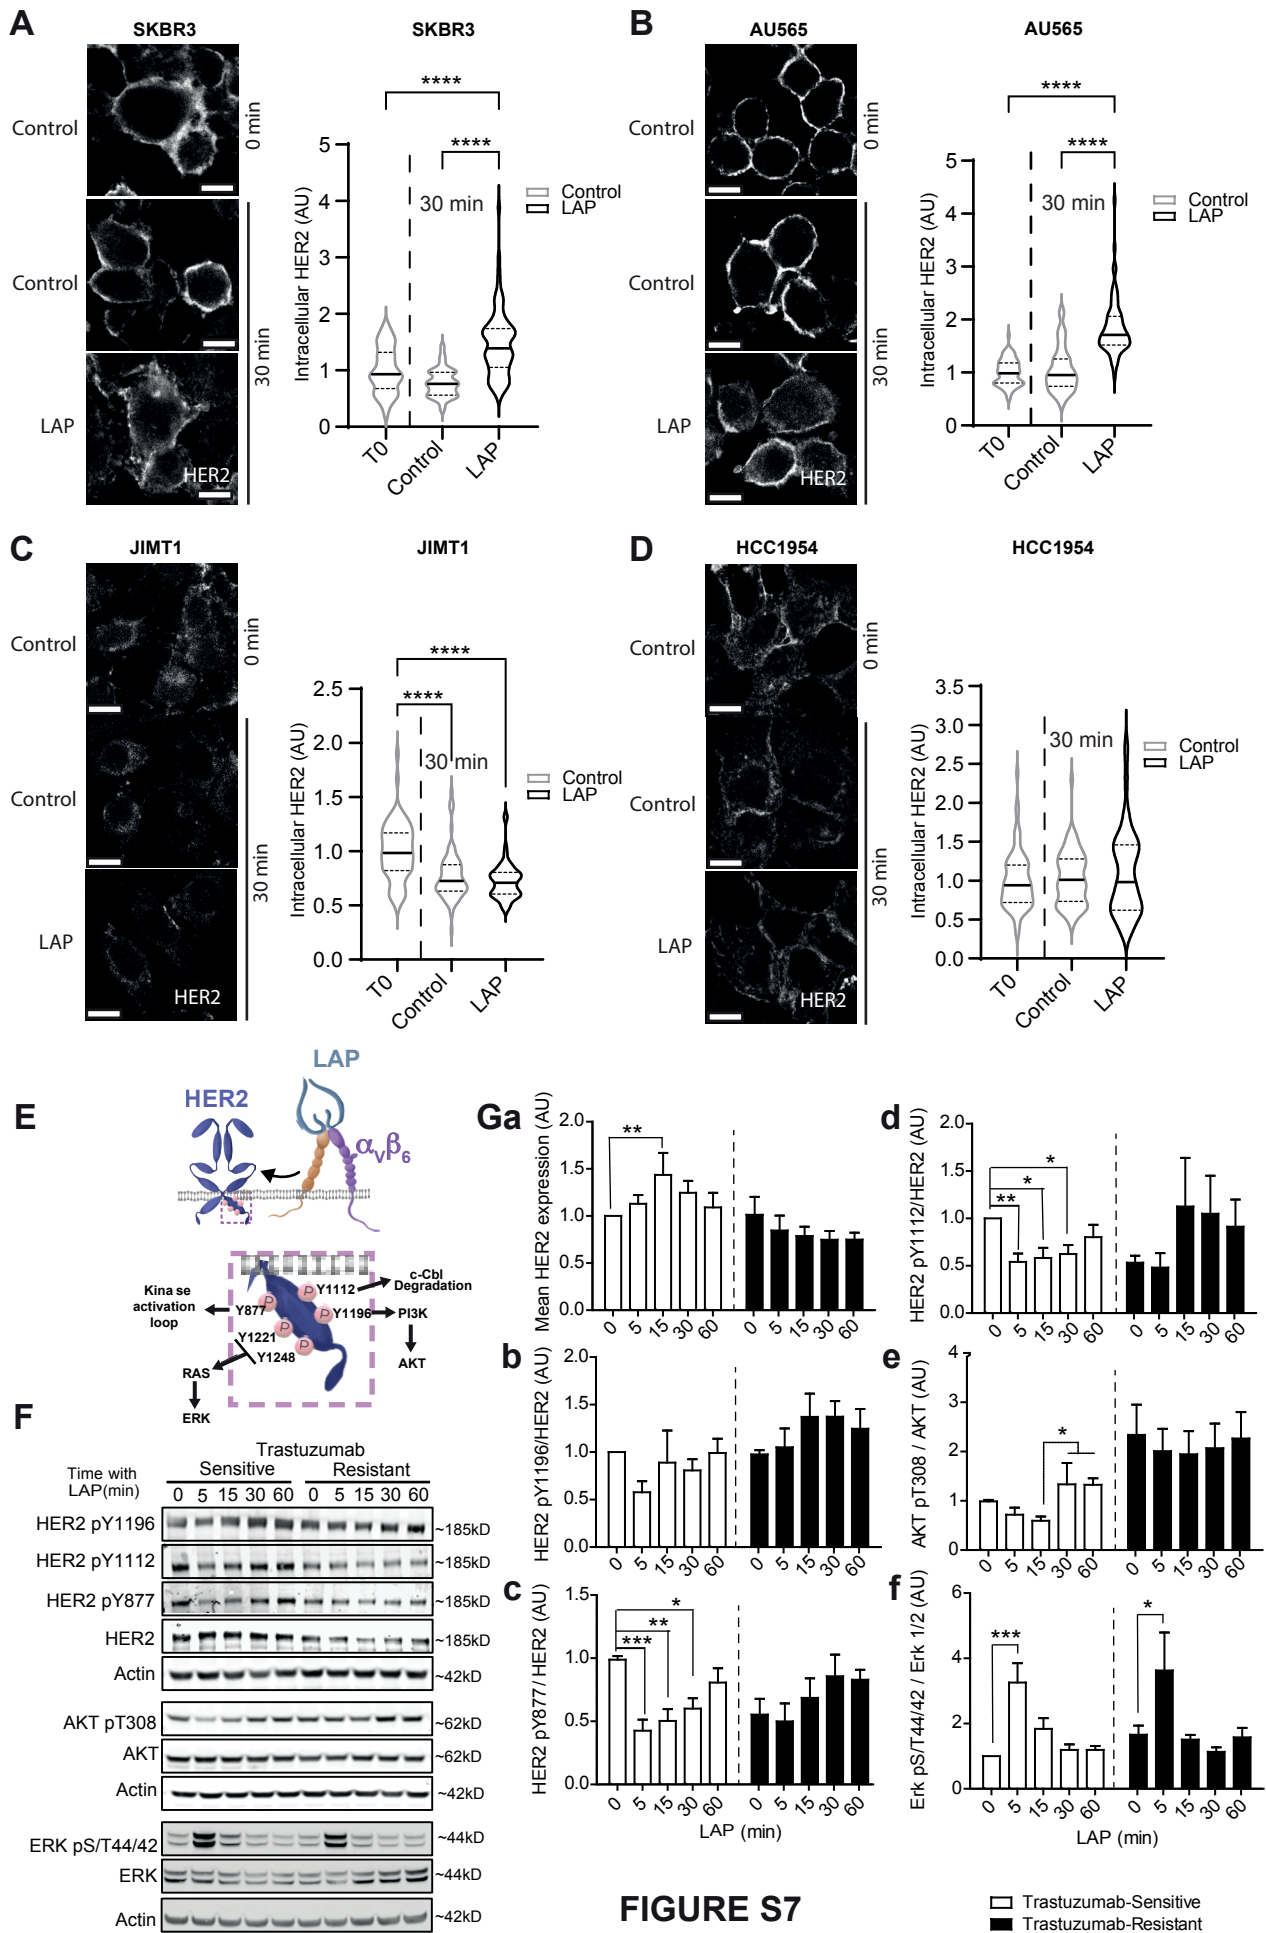



**Figure S7: Ligand-induced  $\alpha V\beta_6$  stimulation triggers internalisation of HER2 in trastuzumab sensitive cells and differential time-dependent regulation of HER2 expression, phosphorylation and MAPK/AKT activity. A-D)** Affibody-chase experiments. Cells were surface-labelled with FITC-conjugated HER2 affibody and stimulated with soluble LAP (LAP), to stimulate  $\alpha V\beta_6$  integrin and trigger  $\alpha V\beta_6$  endocytosis, or vehicle control (Control), for 0 or 30 minutes. Quantitation represents intracellular HER2 fluorescence intensity analysis in **(A/B)** trastuzumab-sensitive SKBR3 and AU565 cells, or **(C/D)** trastuzumab-resistant JIMT1 and HCC1954 cells. Data are arbitrary units (AU) normalised to control means  $\pm$  S.E.M. of 3 independent experiments 68-79 cells per condition, normalised to T0 (0 min) control scale bar= 10  $\mu$ m. One-way ANOVA with Tukey's multiple comparison test: **(A)** SKBR3 cells 0 min (T0) vs LAP 30 min  $P < 0.0001$ , Control 30 min vs LAP 30 min  $P < 0.0001$ ; **(B)** AU565 cells 0 min (T0) vs LAP 30 min  $P < 0.0001$ , Control 30 min vs LAP 30 min  $P < 0.0001$ ; **(C)** JIMT1 cells 0 min (T0) vs Control 30 min  $P < 0.0001$ , 0 min (T0) LAP 30 min  $P < 0.0001$ ; Control 30 min vs LAP 30 min non-significant; **(D)** HCC1954 cells 0 min (T0) vs Control 30 min non-significant, 0 min (T0) vs LAP 30 min non-significant; Control 30 min vs LAP 30 min non-significant. **E)** Schematic diagram showing HER2 phosphorylation sites and the functional consequences of specific post-translational modifications on HER2 function, proteostasis and downstream signalling. **F/G)** Trastuzumab-Sensitive and Trastuzumab-Resistant BT474 cells were treated with soluble LAP for 0, 5, 15, 30 and 60 minutes. **(F)** Representative blots for HER2, HER2 pY1112, HER2 pY1196, HER2 pY877, AKT, AKT pT308, ERK1/2, ERK1/2 pS/T 44/42 and Actin. **(G)** Quantitative analysis of: **(Ga)** HER2 total expression, relative to actin; **(Gb)** HER2 phosphorylation levels of pY1196, **(Gc)** pY877, and **(Gd)** pY1112 relative to total HER2; **(Ge)** AKT phosphorylation (pT308), relative to total AKT; **(Gf)** ERK1/2 phosphorylation (pS/T 44/42), relative to total ERK1/2. All data were normalised to 0 min of trastuzumab-sensitive cells and are presented as Mean  $\pm$  SEM of 8 independent experiments. One-way ANOVA with Dunnett's multiple comparison test: **(Ga)** Trastuzumab-Sensitive 0 vs 15 min  $P = 0.0089$ ; **(Gc)** Trastuzumab-Sensitive 0 vs 5 min  $P = 0.0002$ , 0 vs 15 min  $P = 0.0013$ , 0 vs 30 min  $P = 0.0111$ ; **(Gd)** Trastuzumab-Sensitive 0 vs 5 min  $P = 0.0064$ , 0 vs 15 min  $P = 0.0143$ , 0 vs 30 min  $P = 0.0301$ ; **(Ge)** Trastuzumab-Sensitive 15 vs 30 min  $P = 0.340$ , 15 vs 60 min  $P = 0.0117$ ; **(Gf)** Trastuzumab-Sensitive 0 vs 5 min  $P = 0.0001$ , Trastuzumab-Resistant 0 vs 5 min  $P = 0.0197$ . **A-G)** Statistical significance is denoted with asterisks: \* $P < 0.05$ , \*\* $P < 0.01$ , \*\*\* $P < 0.001$ .



**Figure S8: HER2, RAB5 and integrin  $\alpha_v\beta_6$  colocalise in trastuzumab-sensitive cells following LAP stimulation. A)** Representative immunofluorescence images demonstrating colocalisation of HER2 (green), integrin  $\alpha_v\beta_6$  (yellow) and RAB5 (magenta) in trastuzumab-sensitive and trastuzumab-resistant BT474 cells, treated with soluble LAP for 0 and 15 minutes. Scale bar = 10  $\mu\text{m}$ . Dashed boxes indicate location of insets, highlighting intracellular cytoplasmic regions. For each representative cell image, four versions of each inset are presented to demonstrate levels of Rab5/ $\alpha_v\beta_6$ , HER2/ $\alpha_v\beta_6$ , HER2/Rab5 and Rab5/ $\alpha_v\beta_6$ /HER2 co-localisation. Micrographs represent the same images from **Figure 4C**, demonstrating HER2 and RAB5 subcellular distribution, further analysed to demonstrate 3-channel colocalisation with  $\alpha_v\beta_6$ .

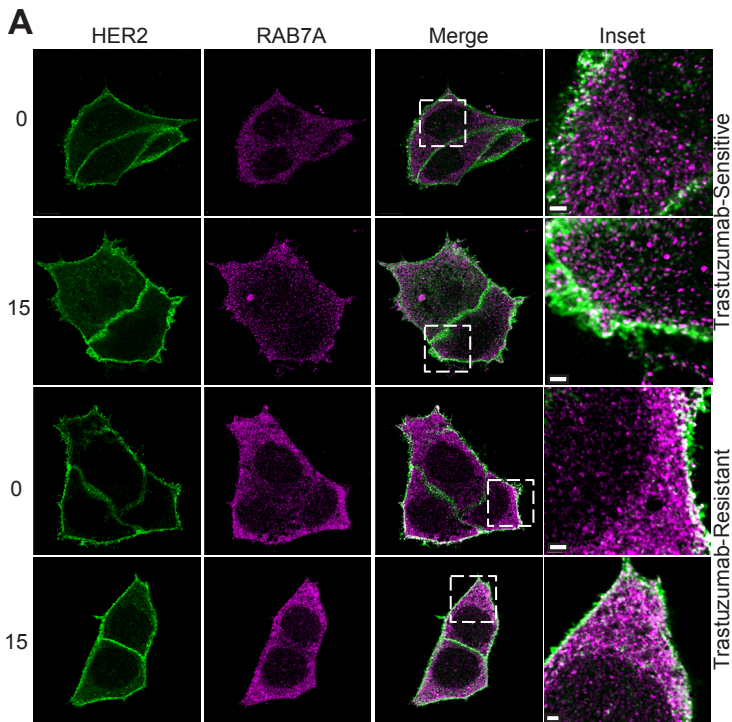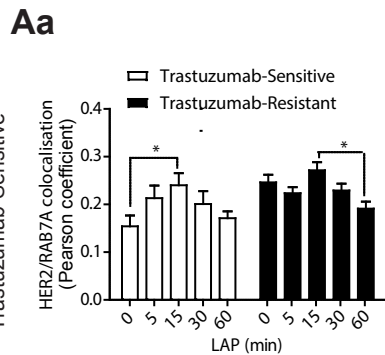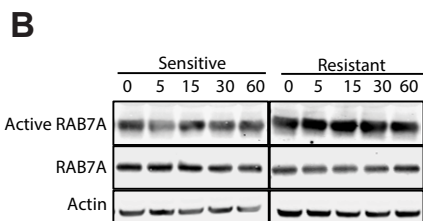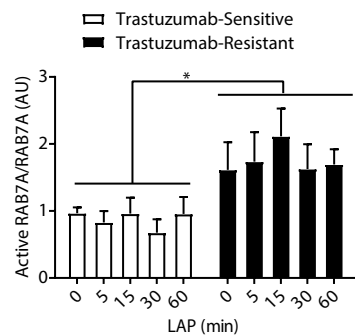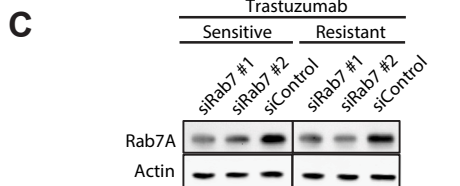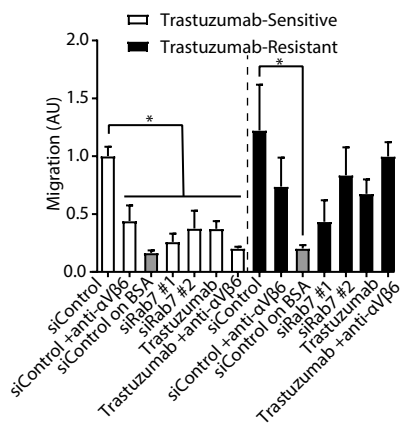

**FIGURE S9**

**Figure S9: RAB7A colocalises with internalised HER2, is activated in trastuzumab resistant cells and is required for  $\alpha_V\beta_6$ - and HER2-dependent migration. A)** Colocalisation analysis of HER2 (green) and RAB7A (magenta) immunofluorescence for in trastuzumab-sensitive and -resistant BT474 cells, treated with soluble LAP for 0, 5, 15, 30 and 60 minutes ( $N = 3$ , 16-28 cells per condition). **Aa)** Quantitative analysis of HER2/RAB7A colocalisation calculated by Pearson's coefficient. Two-way ANOVA with Tukey's multiple comparison test: Trastuzumab-Sensitive 0 vs 15 min  $P = 0.0152$ ; Trastuzumab-Resistant 15 vs 60 min  $P = 0.0174$ . **B)** Representative blots of RAB7A activity during a time-course of LAP stimulation. Active RAB7 (RAB7-GTP): detection of RAB7A in GST-RILP pulldown eluate; total RAB7A expression in total cell lysate. Graph showing mean RAB7A activity, relative to total RAB7A  $\pm$  S.E.M normalised to Trastuzumab-Sensitive cells 0 min.  $N = 3$  independent replicate experiments. One-way ANOVA with Dunnett's multiple comparison test:  $P = 0.0356$ . The immunoblot images separated by a vertical black line, are from the same image of the membrane. The image was split to present Trastuzumab-Sensitive data on the left and Trastuzumab-Resistant data on the right, to maintain consistency in data presentation. **C)** Haptotactic migration analysis of BT474 cells (Trastuzumab-Sensitive and Trastuzumab-Resistant) in Transwells coated with fibronectin, or BSA as negative control. Cells were transfected with siRNA against RAB7A (siRAB7 #1 and siRAB7 #2) or siRNA control. Migration was assessed over 24 hrs in the presence or absence  $\alpha_V\beta_6$  integrin blocking antibody or Trastuzumab. Data shown are mean  $\pm$  S.E.M. of 4 independent experiments. Welch's ANOVA with Dunnett's multiple comparison test: Trastuzumab-Sensitive cells: siControl vs siControl + BSA  $P = 0.0281$ , siControl vs siControl + anti- $\alpha_V\beta_6$   $P = 0.0285$ , siControl vs siRAB7 1  $P = 0.0156$ , siControl vs siRAB7 2  $P = 0.0309$ , siControl vs Trastuzumab  $P = 0.0311$ , siControl vs Trastuzumab + anti- $\alpha_V\beta_6$   $P = 0.0307$ . Trastuzumab-Resistant cells: siControl vs BSA  $P = 0.0151$ . **B/C)** Data are arbitrary units (AU) normalised to control means  $\pm$  S.E.M. Statistical significance \* $P < 0.05$ .

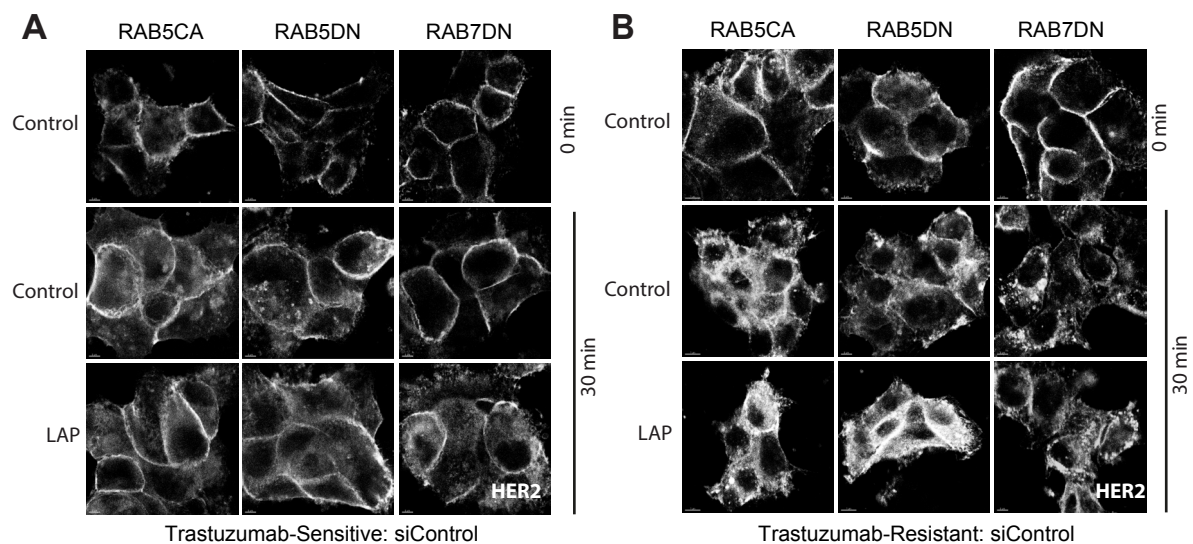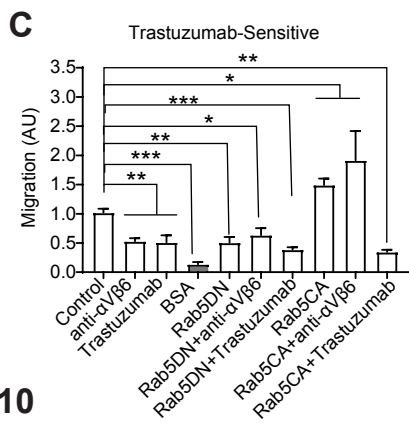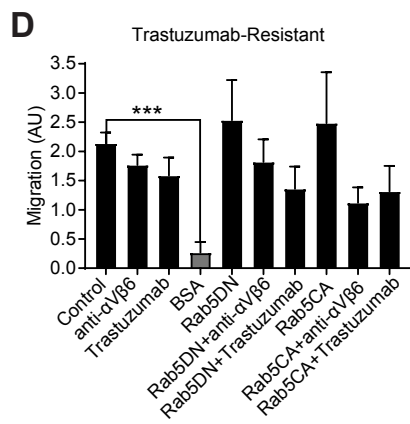

**FIGURE S10**

**Figure S10: RAB5 & RAB7 regulate LAP-dependent internalisation and intracellular accumulation of HER2. A/B)** Representative images of affibody-chase experiments in **(A)** Trastuzumab-Sensitive and **(B)** Trastuzumab-Resistant BT474 cells. Images correspond to quantitative data presented in **Figure 4E/F**. Images represent cells transfected with siRNA Control (siControl) and co-transfected with constitutively active RAB5 (RAB5Q79L-mCherry, RAB5CA), dominant negative RAB5 (RAB5S34N-mcherry, RAB5DN), or dominant negative RAB7 (RAB7T22N-mcherry, RAB7DN). Cells were surface-labelled with FITC-conjugated HER2 affibody and stimulated with soluble LAP (LAP), to stimulate  $\alpha_v\beta_6$  integrin and trigger  $\alpha_v\beta_6$  endocytosis, or vehicle control (control), for 0 or 30 minutes. Due to the reduced level of cell-surface HER2 labelling in trastuzumab-resistant cells, the image intensity is increased in panel **B** compared with panel **A**, to highlight the differences in intracellular accumulation. For further analyses see **Supplementary Results** and **Supplementary Figure S11A-D**. **C/D)** Haptotactic migration analysis of **(C)** Trastuzumab-Sensitive and **(D)** Trastuzumab-Resistant BT474 cells in Transwells coated with fibronectin, or BSA as negative control. Cells were transfected with constitutively active RAB5 (RAB5Q79L-mCherry), dominant negative RAB5 (RAB5S34N-mcherry) or empty mCherry vector. Migration was assessed over 24 hrs in the presence or absence of  $\alpha_v\beta_6$  integrin blocking antibody or Trastuzumab. Data are arbitrary units (AU) normalised to control means  $\pm$  S.E.M. of 4 independent experiments. One-way ANOVA with Welch's multiple comparison: Trastuzumab sensitive cells control vs  $\alpha_v\beta_6$  antibody  $P = 0.005$ ; Trastuzumab and Rab5DN constructs  $P = 0.0013$ ; Control vs Rab5CA  $P = 0.0298$ ; control vs Rab5CA+ $\alpha_v\beta_6$  antibody  $P = 0.0298$ ; control vs Rab5CA+Trastuzumab  $P = 0.0009$ ; Control vs BSA  $P = 0.0002$ . Statistical significance \* $P < 0.05$ , \*\* $P < 0.01$ , \*\*\* $P < 0.001$ .

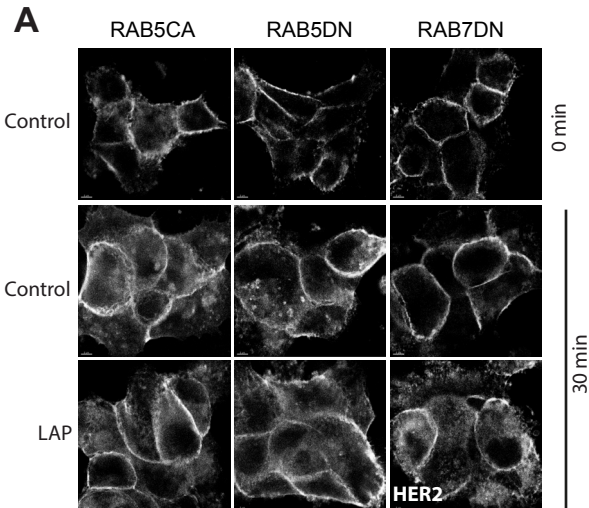

Trastuzumab-Sensitive: siControl

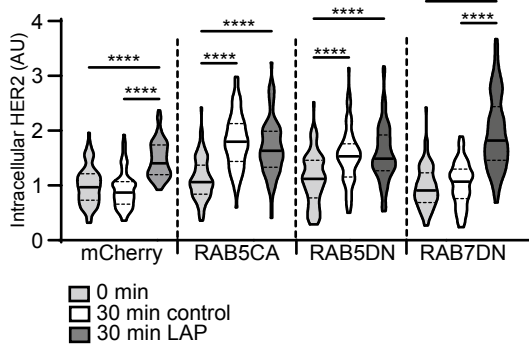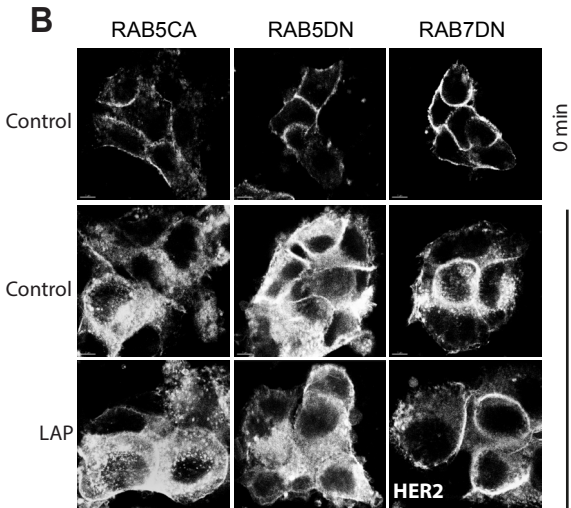

Trastuzumab Sensitive: siGDI2

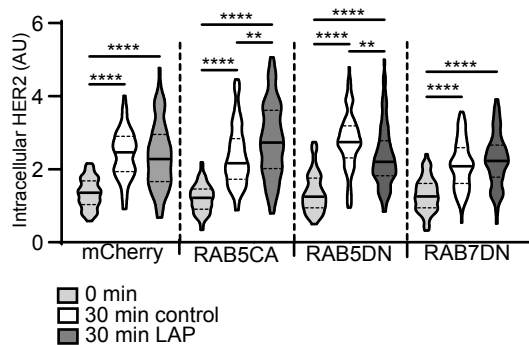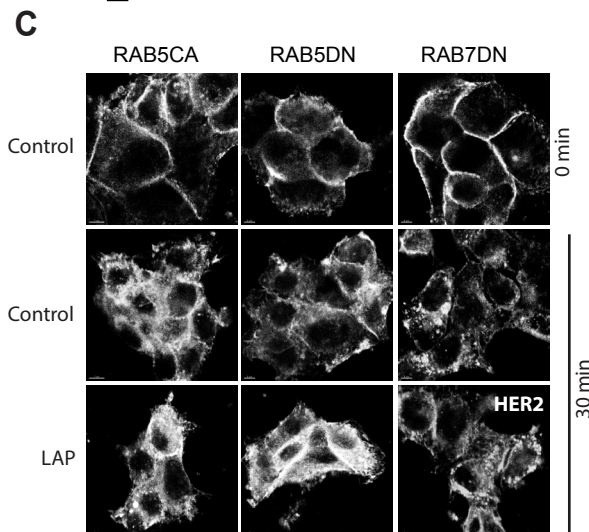

Trastuzumab-Resistant: siControl

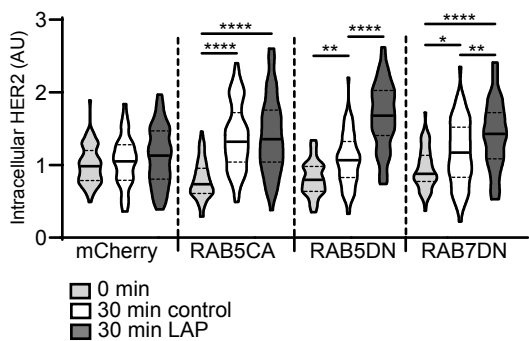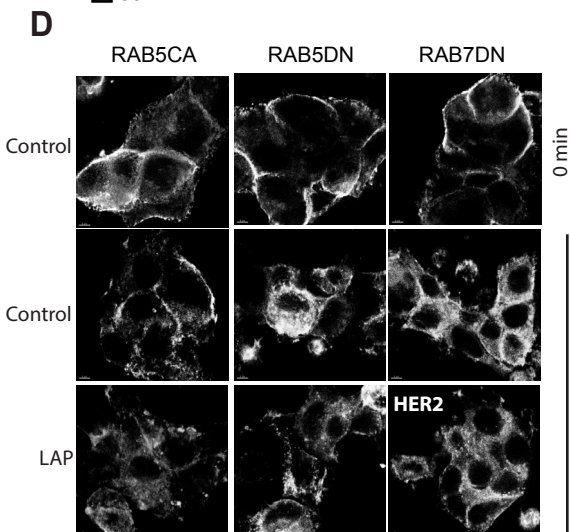

Trastuzumab-Resistant: siGDI2

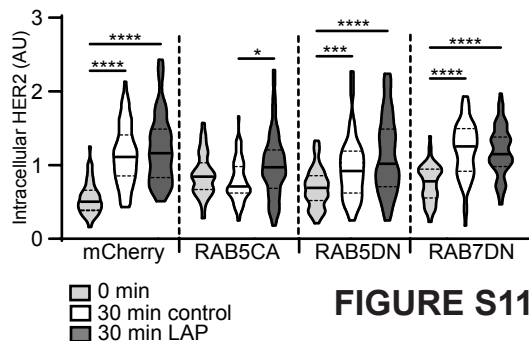

**FIGURE S11**



**Figure S11: GDI2 regulated RAB5 activity to control  $\alpha\text{V}\beta_6$ -dependent HER2 endocytosis and cell migration. A/B)** Affibody-chase experiments in Trastuzumab-Sensitive and Trastuzumab-Resistant BT474 cells transfected with siRNA against GDI2 (siGDI2#1) or siRNA Control (siControl) and co-transfected with constitutively active RAB5 (RAB5Q79L-mCherry, RAB5CA), dominant negative RAB5 (RAB5S34N-mcherry, RAB5DN), dominant negative RAB7 (RAB7T22N-mcherry, RAB7DN) or empty mCherry vector. Cells were surface-labelled with FITC-conjugated HER2 affibody and stimulated with soluble LAP (LAP), to stimulate  $\alpha\text{V}\beta_6$  integrin and trigger  $\alpha\text{V}\beta_6$  endocytosis, or vehicle control (control), for 0 or 30 minutes. Quantitation represents cytoplasmic HER2 fluorescence intensity analysis in **(A)** trastuzumab-sensitive siControl **(B)** trastuzumab-sensitive siGDI2 **(C)** trastuzumab-resistant siControl, and **(D)** trastuzumab-sensitive siGDI2 BT474 cells ( $N = 3$ ; 70-86 cells per condition), scale bar = 5  $\mu\text{m}$ . Statistical significance was assessed using a One-way ANOVA with Tukey test for multiple comparisons; Trastuzumab sensitive cells: **A)** siControl mCherry 0 min vs LAP 30 min  $P < 0.0001$ , 30 min Control vs 30 min LAP  $P < 0.0001$ , siControl RAB5CA 0 min vs Control 30 min  $P < 0.0001$ , 0 min vs LAP 30 min  $P < 0.0001$ . siControl RAB5DN 0 min vs Control 30 min  $P < 0.0001$ , 0 min vs LAP 30 min  $P < 0.0001$ . siControl RAB7DN 0 min vs Control 30 min  $P < 0.0001$ , 0 min vs LAP 30 min  $P < 0.0001$ . **B)** siGDI2 mCherry 0 min vs LAP 30 min  $P < 0.0001$ , 30 min Control vs 30 min LAP  $P < 0.0001$ , siGDI2 RAB5CA 0 min vs Control 30 min  $P < 0.0001$ , 0 min vs LAP 30 min  $P < 0.0001$ , 30 min Control vs 30 min LAP  $P = 0.0051$ .

siGDI2 RAB5DN 0 min vs Control 30 min  $P < 0.0001$ , 0 min vs LAP 30 min  $P < 0.0001$ , 30 min Control vs 30 min LAP  $P = 0.0083$ . siGDI2 RAB7DN 0 min vs Control 30 min  $P < 0.0001$ , 0 min vs LAP 30 min  $P < 0.0001$ . Trastuzumab resistant cells: siControl RAB5CA 0 min vs Control 30 min  $P < 0.0001$ , 0 min vs LAP 30 min  $P < 0.0001$ . siControl RAB5DN 0 min vs Control 30 min  $P = 0.0034$ , 0 min vs LAP 30 min  $P < 0.0001$ . siControl RAB7DN 0 min vs Control 30 min  $P = 0.0233$ , 0 min vs LAP 30 min  $P < 0.0001$ , 30 min Control vs 30 min LAP  $P = 0.0058$ . siGDI2 mCherry 0 min vs LAP 30 min  $P < 0.0001$ , 30 min Control vs 30 min LAP  $P < 0.0001$ , siGDI2 RAB5CA 30 min Control vs 30 min LAP  $P = 0.0316$ . siGDI2 RAB5DN 0 min vs Control 30 min  $P = 0.0008$ , 0 min vs LAP 30 min  $P < 0.0001$ , siGDI2 RAB7DN 0 min vs Control 30 min  $P < 0.0001$ , 0 min vs LAP 30 min  $P < 0.0001$ . Data are arbitrary units (AU) normalised to control means  $\pm$  S.E.M. Statistical significance  $*P < 0.05$ ,  $**P < 0.01$ ,  $***P < 0.001$ ,  $****P < 0.0001$ . Due to differences in cell-surface HER2 levels in the different conditions, baseline image intensity is different in each panel **(A, B, C, D)**, to highlight differences in internalisation. Quantitative data in **Supplementary Figure S11A and S11C** are also presented in **Figure 6 E/F and Supplementary Figure S10A and S10B**.

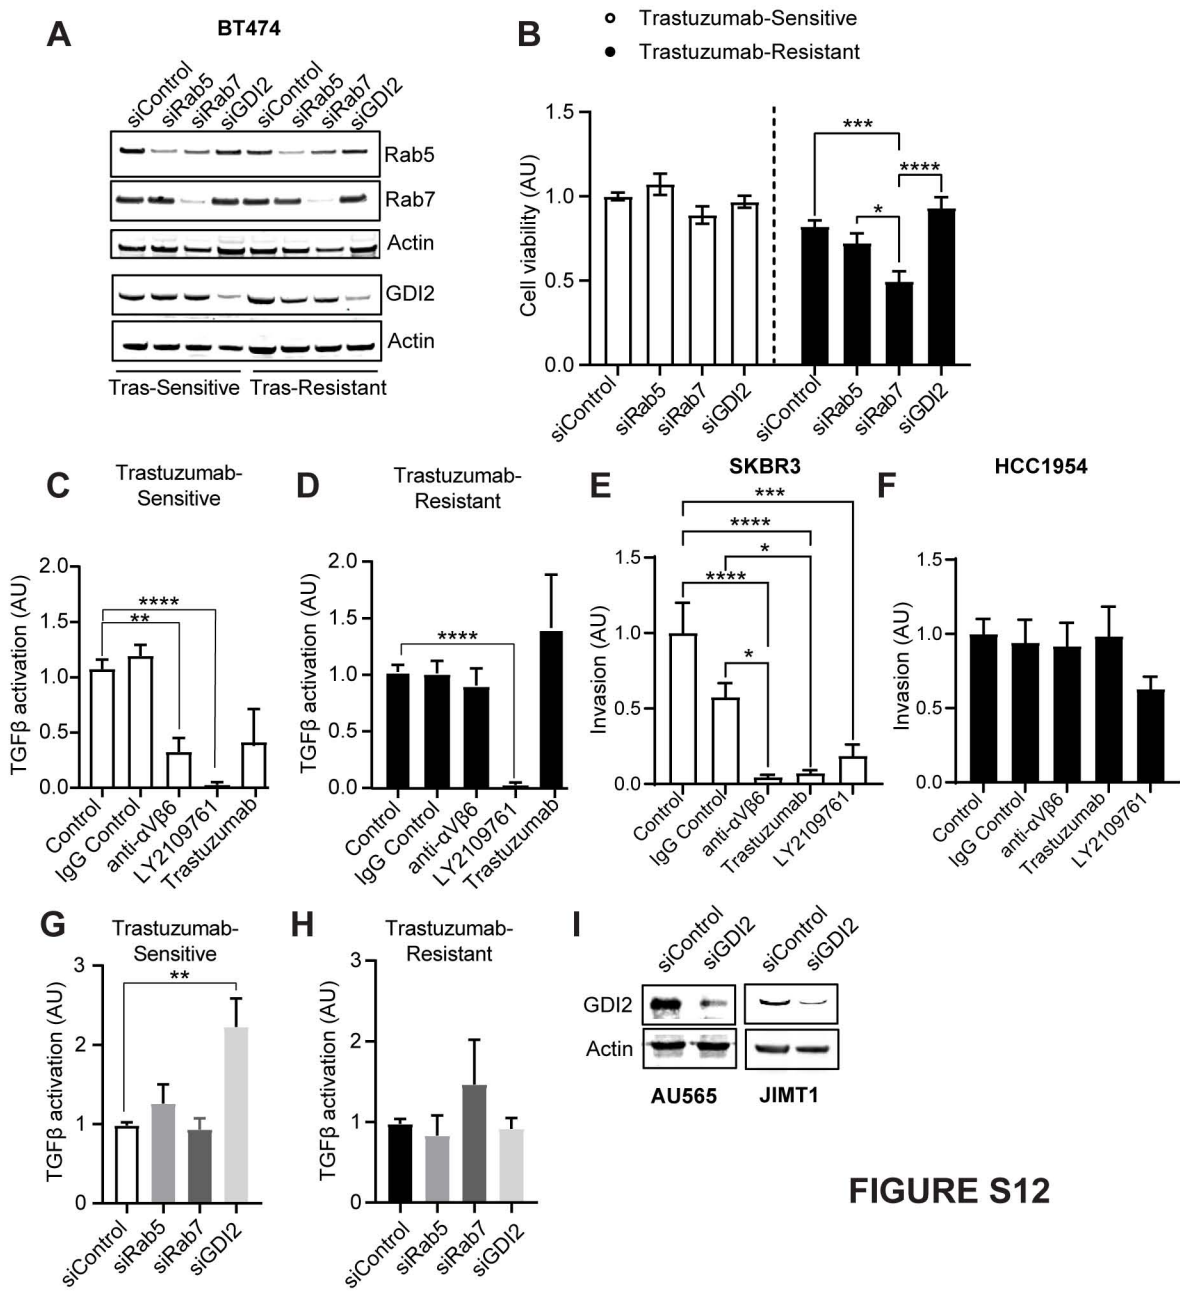

**Figure S12: TGF $\beta$  activity is modulated by integrin  $\alpha$ V $\beta$ 6, HER2 and GDI2 and regulates invasive capacity in trastuzumab-sensitive, but not trastuzumab-resistant cells.** **A)** Representative immunoblots of trastuzumab-sensitive and trastuzumab-resistant BT474 cells transfected with siRNA against RAB5A, RAB7A, GDI2 or control siRNA, probed for RAB5, RAB7, GDI2 and actin. **B)** Cell viability assay (MTS) for trastuzumab-sensitive and trastuzumab-resistant BT474 cells, transfected with siRNA against RAB5A, RAB7A, GDI2 or control siRNA. Data show mean  $\pm$  S.E.M. from 5 independent experiments. Two-way ANOVA with Tukey test for multiple comparisons: Trastuzumab-Resistant siControl vs siRab7  $P < 0.001$ , siRab5 vs siRab7  $P < 0.05$ , siGDI2 vs siRab7  $P < 0.0001$ . **C/D)** TGF $\beta$  activation assays with trastuzumab-sensitive **(C)** and -resistant **(D)** cells seeded on a monolayer of MLECs transfected with inducible TGF $\beta$  reporter, after 16 hours, induction of reporter was measured by luminescence. Cells were treated with trastuzumab (10  $\mu$ g/mL), an inhibitory  $\alpha$ V $\beta$ 6 integrin antibody or a specific inhibitor for TGF $\beta$  receptor 1/2 (LY2109761, 10  $\mu$ M) ( $N = 4$ ). One-Way ANOVA with Tukey's multiples comparison test; significance **(C)** Control vs  $\alpha$ V $\beta$ 6 integrin antibody  $P = 0.0004$ , Control vs LY2109761  $P < 0.0001$  and **(D)** Control vs LY2109761  $P < 0.0001$ . **E/F)** Invasion of trastuzumab-sensitive SKBR3 **(I)** and trastuzumab-resistant HCC1954 **(J)** cells in the presence or absence of  $\alpha$ V $\beta$ 6 integrin blocking antibody, 10  $\mu$ g/mL trastuzumab, or a specific inhibitor for TGF $\beta$  receptor 1/2 (LY2109761, 10  $\mu$ M) ( $N = 3$ ). One-way ANOVA with Tukey's multiples comparisons test; **(E)** SKBR3 control vs  $\alpha$ V $\beta$ 6 antibody  $P < 0.0001$ , control vs trastuzumab  $P < 0.0001$ , control vs LY2109761  $P = 0.0001$ , IgG control vs  $\alpha$ V $\beta$ 6 antibody  $P = 0.0119$ , IgG control vs trastuzumab  $P = 0.0182$ . **G/H)** TGF $\beta$  activation assays. TGF $\beta$  activation analysis of trastuzumab-sensitive **(G)** and -resistant **(H)** BT474 cells transfected with siRNA against RAB5, RAB7 and GDI2 or siRNA control and seeded on a monolayer of MLEC cells ( $N = 4$ ). Kruskal-Wallis with Dunnett's multiples comparison test: **(G)** siControl vs siGDI2  $P = 0.006$ . **I)** Representative immunoblots of trastuzumab-sensitive AU565 cells and endogenously trastuzumab-resistant JIMT1 cells transfected with siRNA against GDI2 or control siRNA, probed for GDI2 and actin. **B-H)** Data are arbitrary units (AU) normalised to control means  $\pm$  S.E.M. **A-E)** Statistical significance \* $P < 0.05$ , \*\* $P < 0.01$ , \*\*\* $P < 0.001$ , \*\*\*\* $P < 0.0001$ .

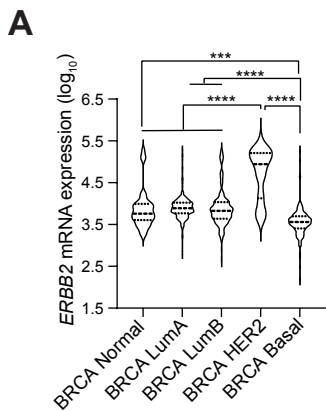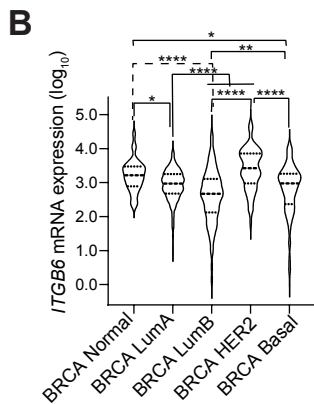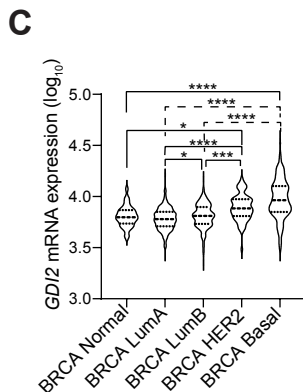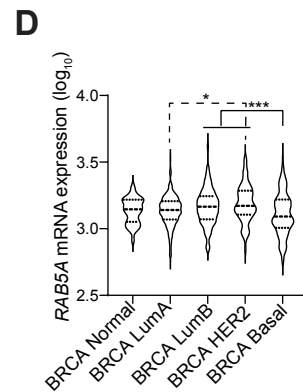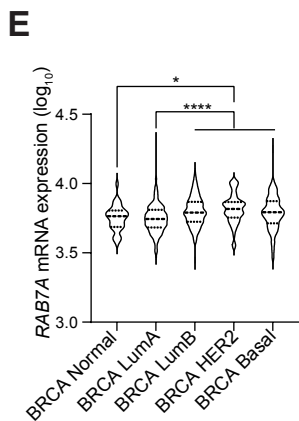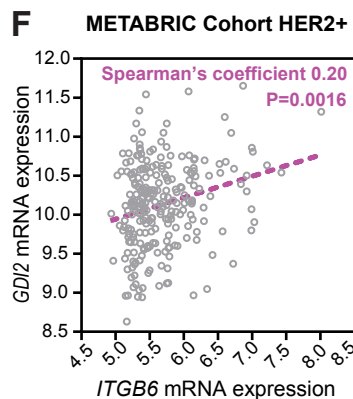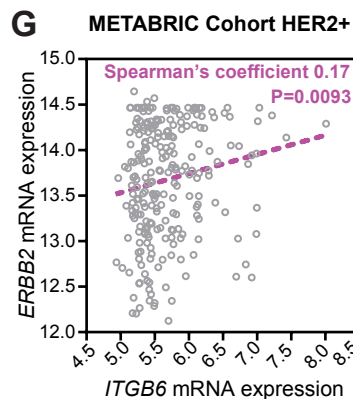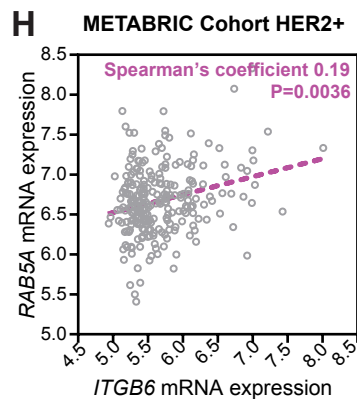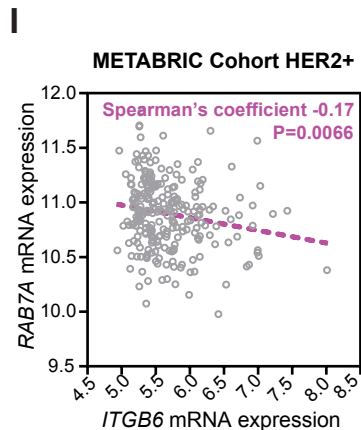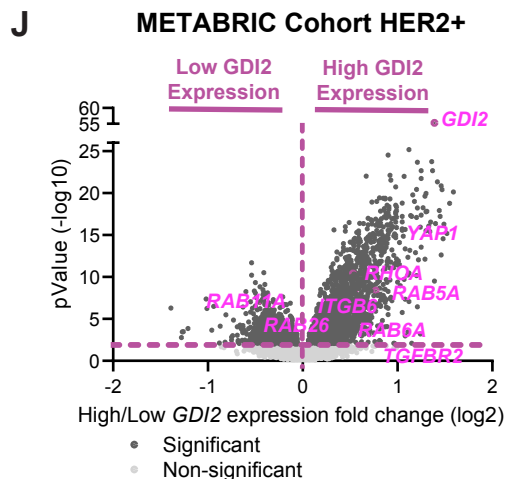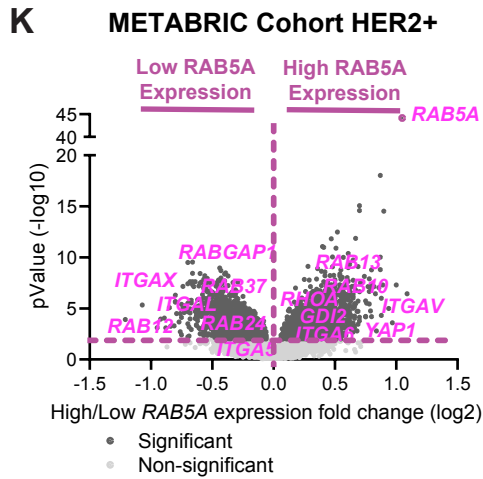

**FIGURE S13**

**Figure S13: *ERBB2*, *ITGB6* and *GDI2* mRNA expression are increased in the most aggressive subtypes of breast cancer. A-E) Analysis of RNA-seq gene expression for *ERBB2* (A), *ITGB6* (B), *GDI2* (C), *RAB5A* (D) and *RAB7A* (E) in breast cancer patients (Breast Invasive Carcinoma TCGA, PanCancer Atlas data set). Data were extracted using the online resource <https://www.cbioportal.org>. Patients were subdivided, according to clinical diagnosis as: Normal-like (BRCA Normal), Luminal A (BRCA LumA), Luminal B (BRCA LumB), HER2+ (BRCA HER2+) and Basal-like (BRCA Basal);  $n = 981$  patients. Dashed lines in violin blots represents the median and dotted lines represent the quartiles. Kruskal-Wallis with Dunn's multiple comparison test: (A) Normal vs HER2+  $P < 0.0001$ , Normal vs. Basal  $P = 0.0002$ , LumA vs HER2+  $P < 0.0001$ , LumB vs HER2+  $P < 0.0001$ , LumB vs Basal  $P < 0.0001$ , HER2+ vs. Basal  $P < 0.0001$ ; (B) Normal vs LumA  $P = 0.0352$ , Normal vs LumB  $P < 0.0001$ , Normal vs Basal  $P = 0.0127$ , LumA vs LumB  $P < 0.0001$ , LumA vs HER2+  $P < 0.0001$ , LumB vs HER2+  $P < 0.0001$ , LumB vs Basal  $P = 0.00084$ , HER2+ vs Basal  $P < 0.0001$ ; (C) Normal vs HER2+  $P = 0.0100$ , Normal vs Basal  $P < 0.0001$ , LumA vs LumB  $P = 0.0220$ , LumA vs HER2+  $P < 0.0001$ , LumA vs Basal  $P < 0.0001$ , LumB vs. HER2+  $P = 0.0001$ , LumB vs Basal  $P < 0.0001$ ; (D) LumA vs HER2+  $P = 0.0293$ , LumB vs Basal  $P = 0.0008$ , HER2+ vs Basal  $P = 0.0003$ ; (E) Normal vs HER2+  $P = 0.0169$ , LumA vs LumB  $P < 0.0001$ , LumA vs HER2  $P < 0.0001$ , LumA vs Basal  $P < 0.0001$ . F-G) Correlation analysis (Spearman's coefficient) of gene expression between *ITGB6* and *GDI2* (F), *ERBB2* (G), *RAB5A* (H), or *RAB7A* (I) in HER2+ breast cancers ( $n = 247$  patients, METABRIC cohort). J/K) Volcano plots representing statistical analysis (ANOVA) of RNA-Seq gene expression data of HER2+ breast cancer patients from the METABRIC cohort expressing high (Q4, Right) and low (Q1, Left) levels of *GDI2* (J) and *RAB5A* (K). Significant proteins (dark grey); non-significant proteins (light grey); proteins of interest highlighted in pink. Statistical significance \* $P < 0.05$ , \*\* $P < 0.01$  \*\*\* $P < 0.001$ , \*\*\*\* $P < 0.0001$ .**

## **SUPPLEMENTARY AUXILLARY FILES**

### **Supplementary File 1 - HER2-18 Adhesion Complex Enrichments – ECM**

Spreadsheet summarising proteomic and ontological analysis of integrin-associated adhesion complexes isolated from HER2-18 cells plated on Collagen-1, Fibronectin and Latency Associated Peptide (LAP).

Worksheets summarise: Protein enrichment; Functional subnetwork (Clusters); GO-term analysis of Collagen-1 vs LAP, Collagen-1 vs Fibronectin; LAP vs Fibronectin.

### **Supplementary File 2 - BT474 Adhesion Complex Enrichments – ECM**

Spreadsheet summarising proteomic and ontological analysis of integrin-associated adhesion complexes isolated from BT-474 cells (trastuzumab-sensitive) plated on Collagen-1, Fibronectin and Latency Associated Peptide (LAP).

Worksheets summarise: Protein enrichment; Functional subnetwork (Clusters); GO-term analysis of Collagen-1 vs LAP, Collagen-1 vs Fibronectin; LAP vs Fibronectin.

### **Supplementary File 3 - BT474 Tras-Sensitive vs Tras-Resistant +/- Trastuzumab - LAP IACs**

Spreadsheet summarising proteomic and ontological analysis of  $\alpha_v\beta_6$ -dependent integrin-associated adhesion complexes isolated from trastuzumab-sensitive & trastuzumab-resistant BT-474 cells +/- pre-treatment with sub-lethal 10 $\mu$ g/ml trastuzumab, plated on Latency Associated Peptide (LAP).

Worksheets summarise: Protein enrichment; GO-term analysis of trastuzumab-sensitive vs trastuzumab-resistant, trastuzumab-sensitive vs +/- trastuzumab.
